# Supplementary material for: Selenium-modified microgels as interfacial catalysts for the heterophase oxidation of aromatic aldehydes
Source: Royal Society of Chemistry journal article supplement (doi:10.1039/d4re00516c), 2025-01-01
Supplement: d4re00516c1.pdf [file d4re00516c1.pdf]

Electronic Supplementary Material (ESI) for Reaction Chemistry & Engineering.  
This journal is © The Royal Society of Chemistry 2024

## Supplementary Information

### **Selenium-modified microgels as interfacial catalysts for the heterophase oxidation of aromatic aldehydes**

Anastasiia Pavliuk,<sup>a</sup> Oliver Fiukowski,<sup>b</sup> Jan Wagner,<sup>c</sup> Tetiana Kharandiuk,<sup>d</sup> Volodymyr Ivasiv,<sup>a</sup> Roman Nebesnyi,<sup>a</sup> Uwe Schnakenberg<sup>c</sup> and Andrij Pich<sup>b</sup>

<sup>a</sup> Technology of Organic Products Department, Lviv Polytechnic National University, Ukraine. S. Bandery 12, Lviv-79013, Ukraine. E-mail: [roman.v.nebesnyi@lpnu.ua](mailto:roman.v.nebesnyi@lpnu.ua)

<sup>b</sup> DWI Leibniz Institute for Interactive Materials e.V., Forckenbeckstraße 50, Aachen-52074, Germany.

<sup>c</sup> Institute of Materials in Electrical Engineering 1, RWTH Aachen University, Sommerfeldstrasse 24, Aachen-52074, Germany

<sup>d</sup> Probiotic Group Luxembourg SA, Henri Koch str. 25, Esch-sur-Alzette, Luxembourg.

Correspondence to: [roman.v.nebesnyi@lpnu.ua](mailto:roman.v.nebesnyi@lpnu.ua)

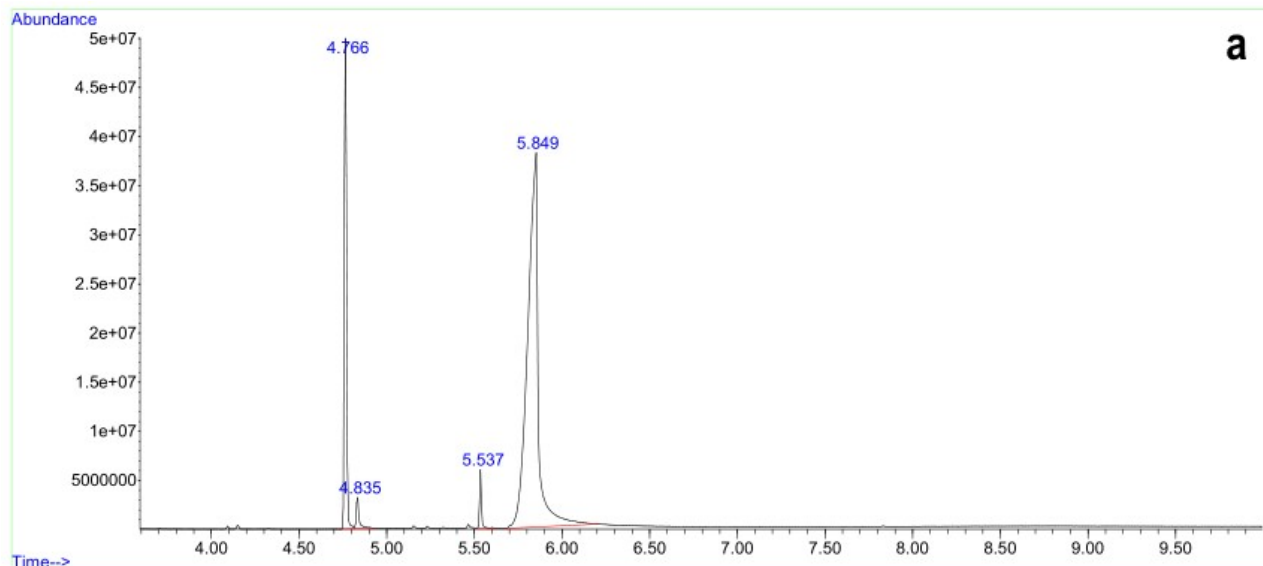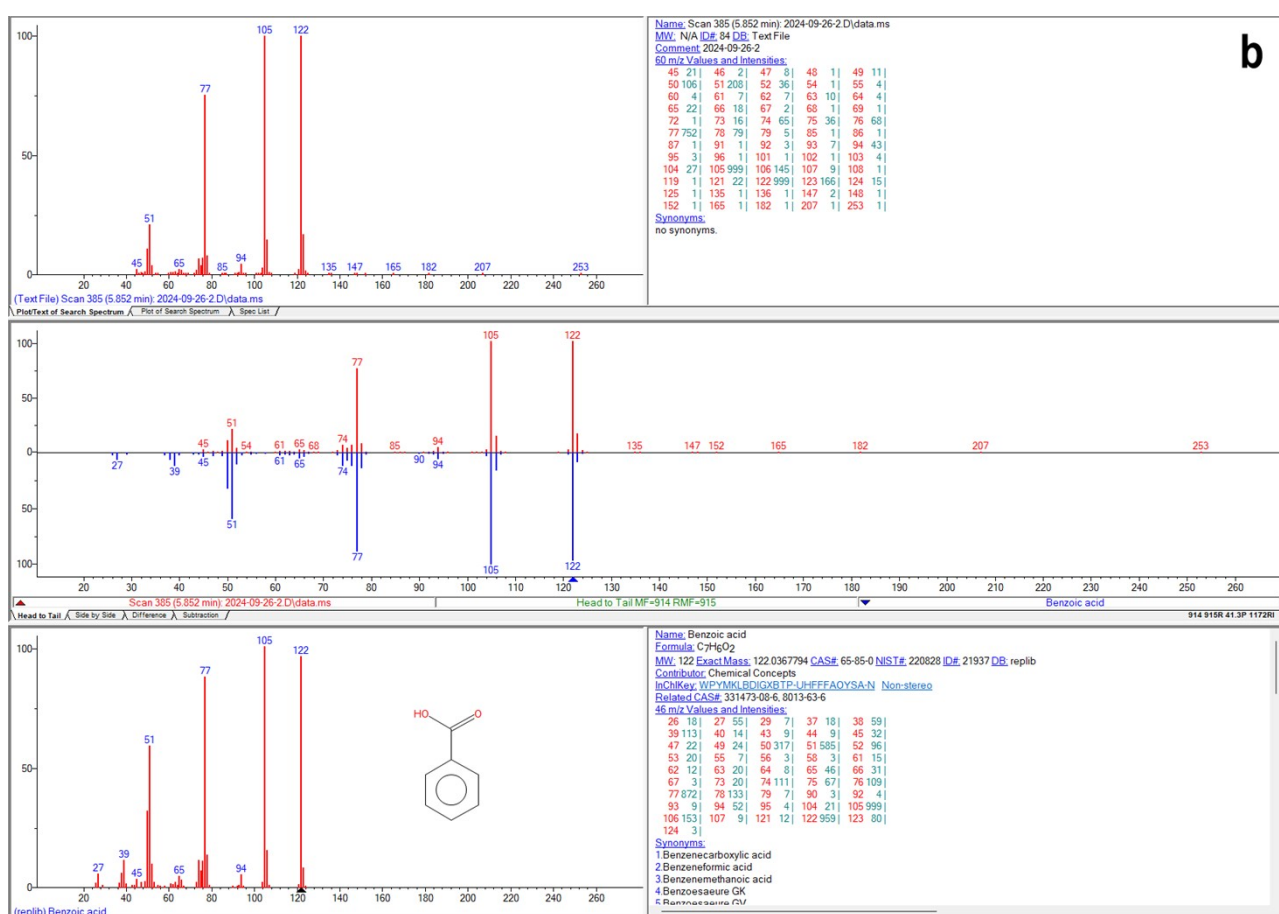

**Fig. S1.** a) Sample chromatogram; b) Mass spectrum of benzoic acid formed in the benzaldehyde oxidation (top) vs the NIST database (bottom).



**Table S1.** Effect of toluene:water ratio and reaction temperature on parameters of benzaldehyde oxidation for Fig. 5a. Catalyst – B1.5Se2.0, catalyst concentration – 0.0044 mmol/ml.

| T:W ratio | T, °C | Benzaldehyde conversion, % | Benzoic acid selectivity, % | Benzoic acid yield, % |
|-----------|-------|----------------------------|-----------------------------|-----------------------|
| 4:1       | 20    | 39.4                       | 60.4                        | 23.8                  |
| 4:1       | 30    | 48.6                       | 92.2                        | 44.8                  |
| 4:1       | 40    | 78.3                       | 94.0                        | 73.6                  |
| 4:1       | 50    | 98.9                       | 96.6                        | 95.6                  |
| 4:1       | 60    | 96.0                       | 98.0                        | 94.1                  |
| 4:1       | 90    | 93.0                       | 98.7                        | 91.8                  |
| 1:1       | 20    | 36.2                       | 21.8                        | 7.9                   |
| 1:1       | 30    | 44.8                       | 56.0                        | 25.1                  |
| 1:1       | 40    | 64.2                       | 72.1                        | 46.3                  |
| 1:1       | 50    | 91.5                       | 92.9                        | 85.0                  |
| 1:1       | 90    | 88.2                       | 95.5                        | 84.2                  |
| 1:4       | 20    | 87.5                       | 95.8                        | 83.8                  |
| 1:4       | 40    | 24.5                       | 68.6                        | 16.8                  |
| 1:4       | 50    | 34.4                       | 65.1                        | 22.4                  |
| 1:4       | 60    | 42.8                       | 73.1                        | 31.3                  |
| 1:4       | 90    | 44.1                       | 72.3                        | 31.9                  |
| 0         | 20    | 39.7                       | 77.6                        | 30.8                  |
| 0         | 30    | 36.4                       | 76.9                        | 28.0                  |
| 0         | 40    | 9.7                        | 82.5                        | 8.0                   |
| 0         | 50    | 12.2                       | 85.2                        | 10.4                  |
| 0         | 90    | 20.8                       | 83.7                        | 17.4                  |

**Table S2.** Kinetic data (time dependence of concentrations) for Fig. 5b. Solvent – Toluene/Water 4:1, catalyst – Se 2.0 microgel.

| T, °C | Benzaldehyde concentration, mmol/ml |       |       |       |       |       |
|-------|-------------------------------------|-------|-------|-------|-------|-------|
|       | 0 h                                 | 0.5 h | 1 h   | 2 h   | 3 h   | 8 h   |
| 20    | 2.000                               | 1.938 | 1.879 | 1.764 | 1.657 | 1.212 |
| 30    | 2.000                               | 1.919 | 1.840 | 1.694 | 1.558 | 1.028 |
| 40    | 2.000                               | 1.818 | 1.652 | 1.365 | 1.128 | 0.434 |
| 50    | 2.000                               | 1.510 | 1.141 | 0.812 | 0.642 | 0.022 |
| 60    | 2.000                               | 1.523 | 1.160 | 0.672 | 0.390 | 0.080 |
| 90    | 2.000                               | 1.536 | 1.179 | 0.696 | 0.410 | 0.140 |

**Table S3.** Kinetic data (time dependence of concentrations) for Fig. 5c. Solvent – Toluene/Water, catalyst – Se 2.0 microgel, temperature – 50 °C.

| Toluene/Water ratio | Benzaldehyde concentration, mmol/ml |       |       |       |       |       |
|---------------------|-------------------------------------|-------|-------|-------|-------|-------|
|                     | 0 h                                 | 0.5 h | 1 h   | 2 h   | 3 h   | 8 h   |
| 4:1                 | 2.000                               | 1.510 | 1.141 | 0.812 | 0.642 | 0.022 |
| 1:1                 | 2.000                               | 1.714 | 1.470 | 1.080 | 0.793 | 0.170 |
| 1:4                 | 2.000                               | 1.948 | 1.897 | 1.800 | 1.707 | 1.312 |
| Water               | 2.000                               | 1.984 | 1.968 | 1.936 | 1.905 | 1.757 |

**Table S4.** Effect of reaction time on parameters of benzaldehyde oxidation for Fig. 6a. Solvent – Toluene/Water 4:1, catalyst – B1.5Se2.0, catalyst concentration – 0.0044 mmol/ml.

| Time, h | Benzaldehyde conversion, % | Benzoic acid selectivity, % | Benzoic acid yield, % |
|---------|----------------------------|-----------------------------|-----------------------|
| 3       | 67.9                       | 82.6                        | 56.1                  |
| 5       | 97.3                       | 91.2                        | 88.8                  |
| 8       | 98.9                       | 96.6                        | 95.6                  |

**Table S5.** Oxidation of different aromatic aldehydes for Fig. 8. Catalyst – B1.5Se2.0, catalyst concentration – 0.0044 mmol/ml.

| Initial Aldehyde | X, % | Products            | S, % | Y, % |
|------------------|------|---------------------|------|------|
| Cinnamaldehyde   | 84.1 | Cinnamic acid       | 35.4 | 29.8 |
|                  |      | Hydrocoumarin       | 11.7 | 9.8  |
|                  |      | Benzoic acid        | 20.3 | 17.1 |
| Anisaldehyde     | 83.0 | Anisic acid         | 34.3 | 28.5 |
|                  |      | Mequinol            | 42.4 | 35.2 |
| Veratraldehyde   | 59.4 | Veratric acid       | 2.9  | 1.7  |
|                  |      | 3,4-Dimethoxyphenol | 65.7 | 39.0 |
| Benzaldehyde     | 98.9 | Benzoic acid        | 96.6 | 95.6 |

**Table S6.** Kinetic data (time dependence of concentrations) for Fig. 9. Solvent – Toluene/Water 4:1, catalyst – Se 2.0 microgel, temperature – 50 °C.

| Cycle                 | Benzaldehyde concentration, mmol/ml |       |       |       |       |       |
|-----------------------|-------------------------------------|-------|-------|-------|-------|-------|
|                       | 0 h                                 | 0.5 h | 1 h   | 2 h   | 3 h   | 8 h   |
| 1 <sup>st</sup> cycle | 2.000                               | 1.510 | 1.141 | 0.812 | 0.642 | 0.022 |
| 2 <sup>nd</sup> cycle | 2.000                               | 1.517 | 1.151 | 0.662 | 0.381 | 0.037 |
| 3 <sup>rd</sup> cycle | 2.000                               | 1.523 | 1.159 | 0.672 | 0.389 | 0.060 |

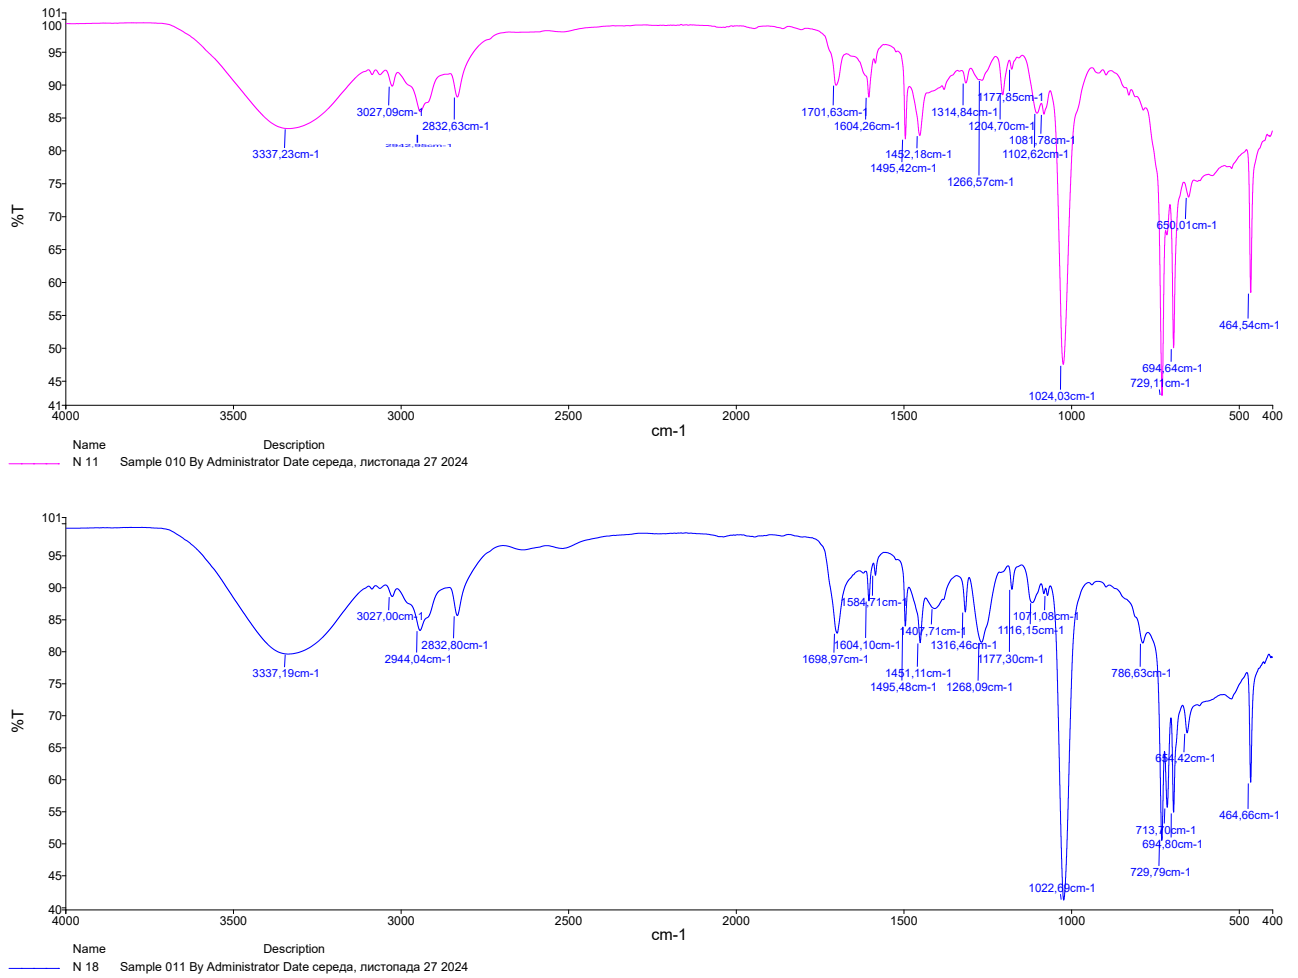

**Fig. S4.** FT-IR spectrums of microgel: N11 – after first usage cycle (8 h), N18 – after third usage cycle (24 h).
